# Supplementary material
Source: ML conference proceedings conference paper supplement (https://openreview.net/forum?id=1QWcueC0lfZ)
Supplement: supplementary_material [file attachment]

Proportion of newly directed edges

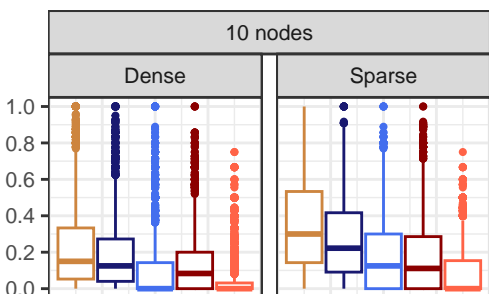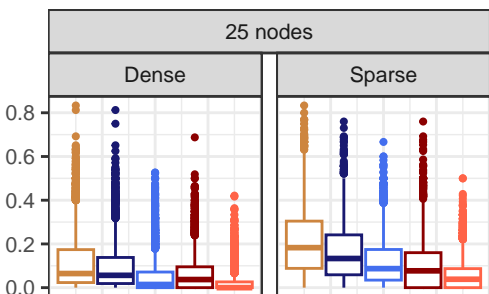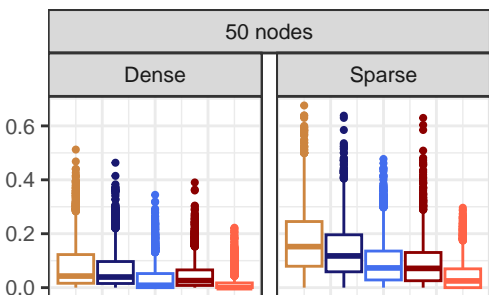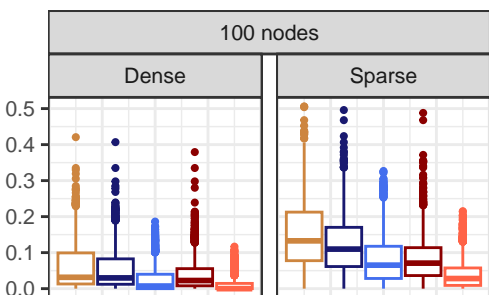

Tiered ordering

$\tau_{full}$   $\tau_{early2}$   $\tau_{late2}$   
 $\tau_{early1}$   $\tau_{late1}$
