# Supplementary material
Source: ML conference proceedings conference paper supplement (https://openreview.net/forum?id=1QWcueC0lfZ)

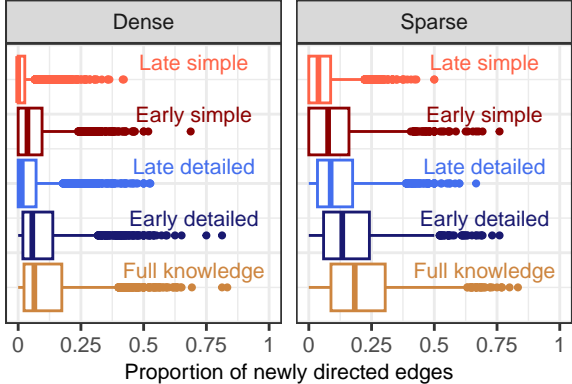

Supplement: supplementary_material [file attachment]

Number of newly directed edges

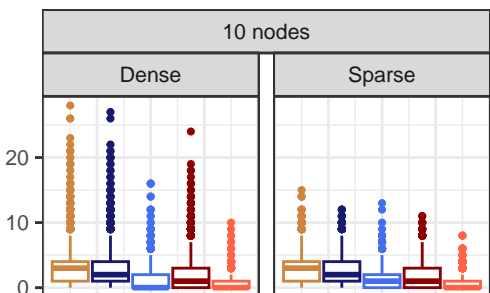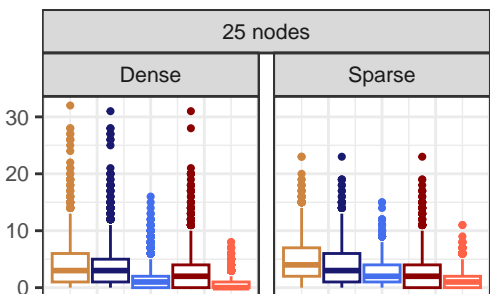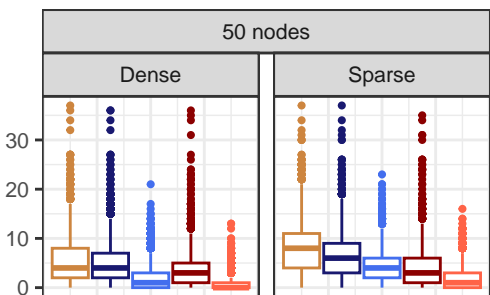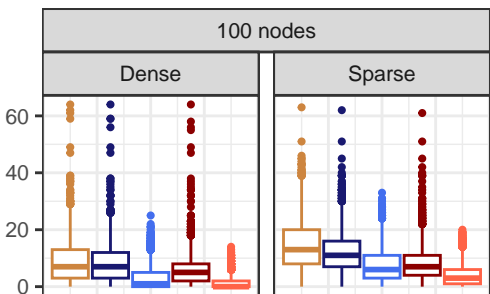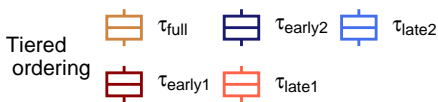

Supplement: supplementary_material [file attachment]
